# Supplementary material for: <em>Vernonia amygdalina</em> Leaf Extract Induces Apoptosis in HeLa Cells: A Metabolomics and Proteomics Study
Source: Preprints.org preprint supplement (doi:10.20944/preprints202407.2394.v1), 2024-07-30
Supplement: Supplementary file 2 [file supplementary]

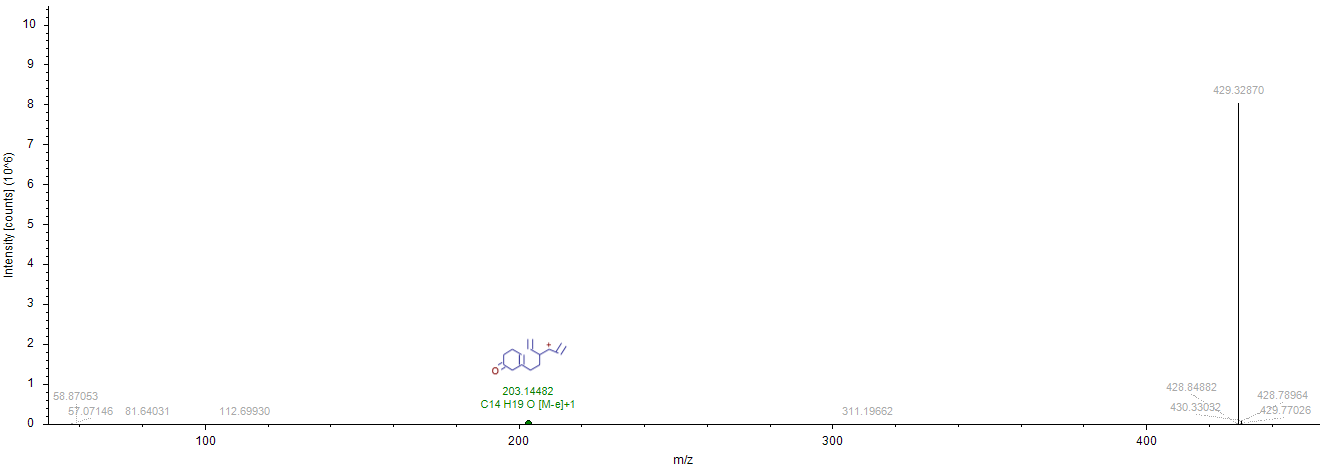


**Figure S1:** The unique fragment ions spectrum (MS2) of nandrolene.


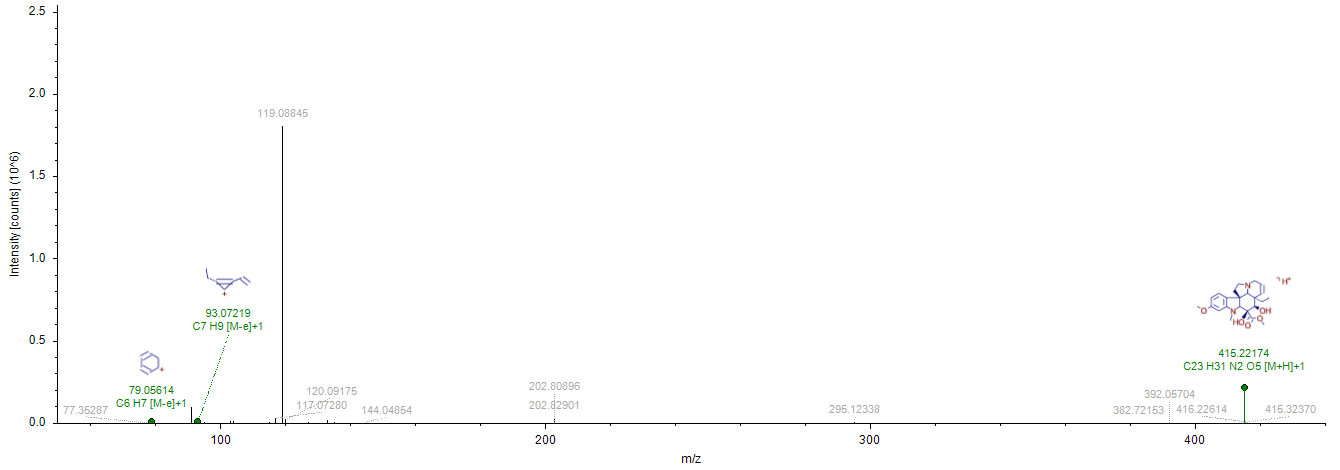


**Figure S2:** The unique fragment ions spectrum (MS2) of deacetylvindoline.
